# Supplementary material for: Dendritic cell–induced autoimmune heart failure requires cooperation between adaptive and innate immunity
Source: Springer Nature journal article supplement (doi:10.1038/nm960), 2003-11-16
Supplement: nm960-S2.pdf [file nm960-S2.pdf]

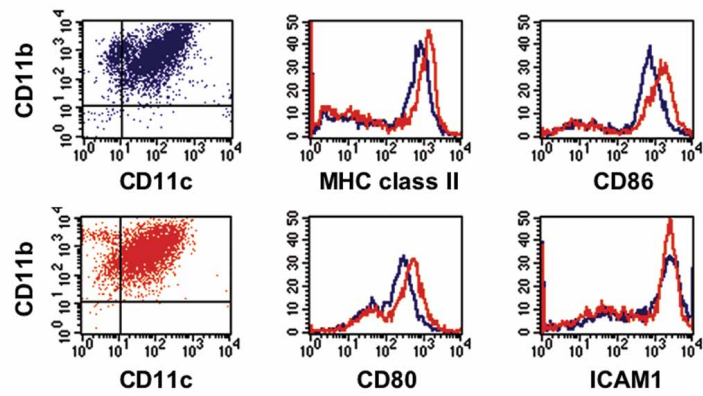

Supplementary figure 2.

Expression of costimulatory molecules on *Tnfrsf5*<sup>+/+</sup> (blue) and *Tnfrsf5*<sup>-/-</sup> (red) DCs, lacking CD40 after stimulation with LPS/anti-CD40 for 12 hours. FACS histograms were gated on CD11c<sup>+</sup> CD11b<sup>+</sup> MHC class II<sup>+</sup> live cells (ICAM, B7.1, B7.2) or CD11c<sup>+</sup> CD11b<sup>+</sup> live cells.
